# Supplementary material
Source: publisher site journal article supplement (https://www.dovepress.com/article/578231)
Supplement: Supplementary file 1 [file 578231%20Revised%20Table%20S1-S2.docx]

**Tables S1 **Renal Function Parameters and Inflammatory Cytokine Levels in Serum and Renal Tissue of SA-AKI Mice** (±s)**

| Group | Serum | | Serum | | Kidney | |
| --- | --- | --- | --- | --- | --- | --- |
| BUN | creatinine | TNFα | IL-1β | TNFα | IL-1β |
| Control | 3.59±0.26 | 69.30±9.34 | 14.45±1.13 | 3.70±1.50 | 6621753±5517.92 | 13566.13±3469.81 |
| SA-AKI | 6.42±0.24 | 157.46±35.72 | 61.47±19.95 | 18.99±2.40 | 139478.19±19952.54 | 30802.81±2397.99 |
| t | 19.30 | 5.848 | 5.764 | 13.24 | 8.669 | 10.01 |
| P | <0.0001 *** | 0.0002 *** | 0.0002*** | <0.0001 *** | <0.0001 *** | <0.0001 *** |

N=9, BUN, nmol/L; creatinine, μmol/L; TNFα, pg/mL; IL-1β, pg/mL. ***P<0.001.

**Tables S2 Renal Function Biomarkers and Inflammatory Cytokine Levels in Serum and Kidney Tissues of SA-AKI Mice Following Cyclosporin H Treatment(±s)**

| Group | Serum | | Serum | | Kidney | |
| --- | --- | --- | --- | --- | --- | --- |
| BUN | creatinine | TNFα | IL-1β | TNFα | IL-1β |
| Control | 4.98±0.26 | 37.64±13.78 | 46.83±8.08 | 4.84±1.20 | 55092.68±18219.65 | 4914.57±2500.42 |
| SA-AKI | 10.68±0.24 | 151.68±35.55 | 165.88±14.64 | 46.68±2.40 | 174141.24±19952.54 | 48047.59±2397.99 |
| Cyclosporin H | 7.78±0.24 | 84.74±9.25 | 113.72±9.96 | 28.25±2.39 | 123130.29±19952.54 | 29619.66±2397.99 |
| t1 | 39.33 | 7.326 | 17.44 | 38.24 | 10.79 | 30.50 |
| P1 | <0.0001 *** | <0.0001 *** | <0.0001 *** | <0.0001 *** | <0.0001 *** | <0.0001 *** |
| t2 | 20.88 | 4.463 | 7.217 | 13.31 | 4.428 | 13.31 |
| P2 | <0.0001 *** | 0.0012 ** | <0.0001 *** | <0.0001 *** | 0.0013** | <0.0001 *** |

N=6, **t₁ and P₁ denote the t-values and p-values for comparisons between the control and SA-AKI groups**; **t2 and P2 denote the t-values and p-values for comparisons between the SA-AKI and SA-AKI+**Cyclosporin H **groups.** ; BUN, nmol/L; creatinine, μmol/L; TNFα, pg/mL; IL-1β, pg/mL. **P<0.01, ***P<0.001.
